# Supplementary material for: Accuracy of self-reported height, weight, and waist circumference in poor, rural areas of China
Source: PeerJ journal article supplement (doi:10.7717/peerj.18525), 2024-11-15
Supplement: Supplementary_Table_1.docx [file Supplementary_Table_1.docx]

**Supplementary Table 1. General demographic features of the sample and comparison with the population of Janzhai County and all of China**

|  | Sample | Janzhai County[1] | China[2] |
| --- | --- | --- | --- |
| Gender |  |  |  |
| Men | 980 (35.91) | 260861 (52.54) | 723339956 (51.24) |
| Women | 1749 (64.09) | 235640 (47.46) | 688438768 (48.76) |
| Age (years) |  |  |  |
| 18-44 | 669 (24.51) | 89909 (18.11) b | 253383938 (17.95) b |
| 45-59 | 1481 (54.27) | 293457 (59.11) c | 894376020 (63.35) c |
| 60- | 579 (21.22) | 113135 (22.79) | 264018766 (18.70) |
| Education |  |  |  |
| Illiteracy a |  | 7175 (1.45) d | 37750200 (2.67) d |
| Primary or below | 1742 (63.83) | 120956 (24.36) e | 349658828 (24.77) e |
| Junior school | 803 (29.42) | 162184 (32.67) | 487163489 (34.51) |
| Senior or above | 184 (6.74) | 114632 (23.09) | 431366025 (30.55) |
| Marital status |  |  |  |
| Single | 72 (2.63) |  |  |
| Married/ cohabitation | 2505 (91.79) |  |  |
| Divorced/ widowed / separated | 152 (5.57) |  |  |
| Occupation |  |  |  |
| Agriculture and forestry | 1948 (71.38) |  |  |
| Professionals | 95 (3.48) |  |  |
| Industrial and commercial service | 192 (8.04) |  |  |
| Housework | 427 (15.65) |  |  |
| Others | 67 (2.46) |  |  |
| Annual family income f |  |  |  |
| Less than 10, 000 RMB | 131 (5.20) |  |  |
| 10000 RMB | 1278 (50.69) |  |  |
| 50000 RMB | 891 (35.34) |  |  |
| 100000 RMB | 221 (8.77) |  |  |
| Total | 2729 | 496501 | 1411778724 g |

a For Janzhai County and China only.

b The age group was 0-14 for Janzhai County and China.

c The age group was 15-59 for Janzhai County and China.

d People aged 15 and above who cannot read.

e Education was primary school for Janzhai County and China.

f There were missing values for annual family income.

g Data from Hong Kong, Macao and Taiwan were not included

[1] Jinzhai County Bureau of Statistics. Data of the Seventh National Population Census for Jinzhai County. Available online: <https://www.ahjinzhai.gov.cn/public/6617541/36008888.html> (accessed on 21 August 21, 2024)

[2] Office of the Leading Group of the State Council for the Seventh National Population Census. Major Figures on 2020 Population Census of China [M]. Beijing: China Statistics Press, 2021.
